# Supplementary figures and images for: Use of nurse-led telephone follow-up as a sole method of assessing patients after nasal surgery
Source: PubMed Central journal article supplement — BMJ Qual Improv Rep. 2015 Mar 31;4(1):u208386.w3311. doi: 10.1136/bmjquality.u208386.w3311 (PMC4645879; doi:10.1136/bmjquality.u208386.w3311), 2015-03-31

**Number of Patients Correctly Followed up following Nasal Surgery**

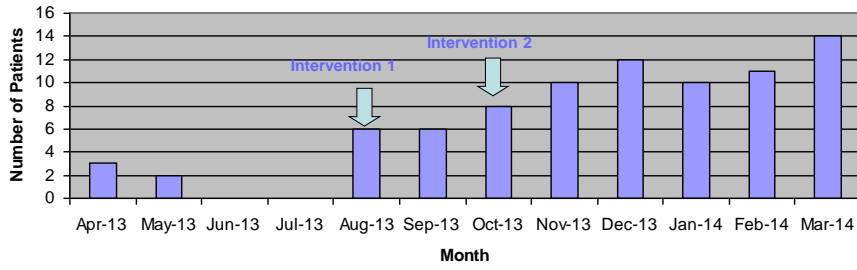

Supplement: bmjqir-4-u208386-w3311-s1.pdf [file bmjqir-4-u208386-w3311-s1.pdf]
